# Supplementary material for: Predicting Deep Learning Based Multi-Omics Parallel Integration Survival Subtypes in Lung Cancer Using Reverse Phase Protein Array Data
Source: PubMed Central journal article supplement (PMC7603376; doi:10.3390/biom10101460), 2020-10-19
Supplement: biomolecules-10-01460-s001.pdf [file biomolecules-10-01460-s001.pdf]

## Supplementary information

### **Predicting Deep Learning Based Multi-Omics Parallel Integration Survival Subtypes in Lung Cancer Using Reverse Phase Protein Array Data**

The file contains

Supplementary Figures 1 – 4

Supplementary Tables 1 – 2

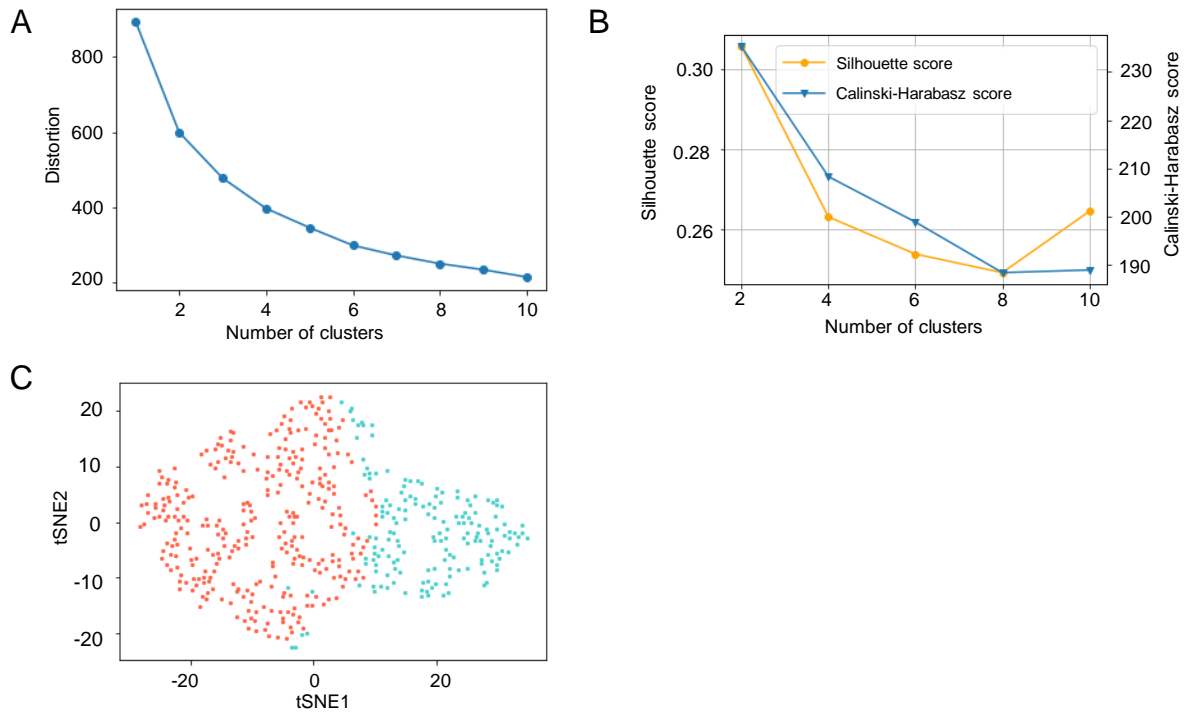

**Supplementary Figure S1.** Prediction of the cluster number and k-means clustering using RPPA common data. (A) Result of the elbow method. The *x*-axis shows the number of clusters; the *y*-axis shows the distortion score. (B) Result of the Calinski-Harabasz index and Silhouette Coefficient. The *x*-axis shows the number of clusters; the *y*-axis shows the Silhouette score or Calinski-Harabasz score. (C) Visualization of the k-means clustering by t-SNE.

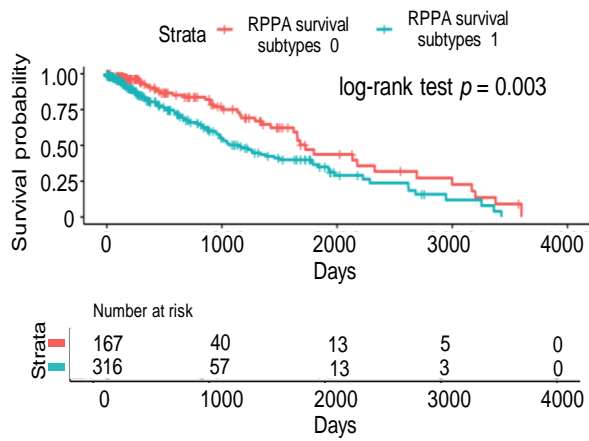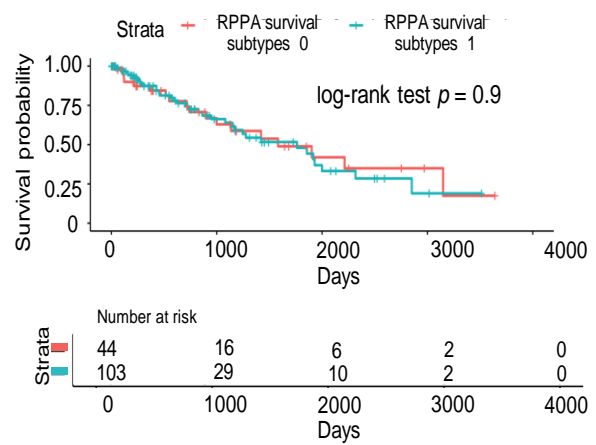

**Supplementary Figure S2.** Kaplan-Meier survival curve of the RPPA common and uncommon dataset. (A) RPPA common dataset using the RPPA survival subtypes. (B) RPPA uncommon dataset using the inferred RPPA survival subtypes.

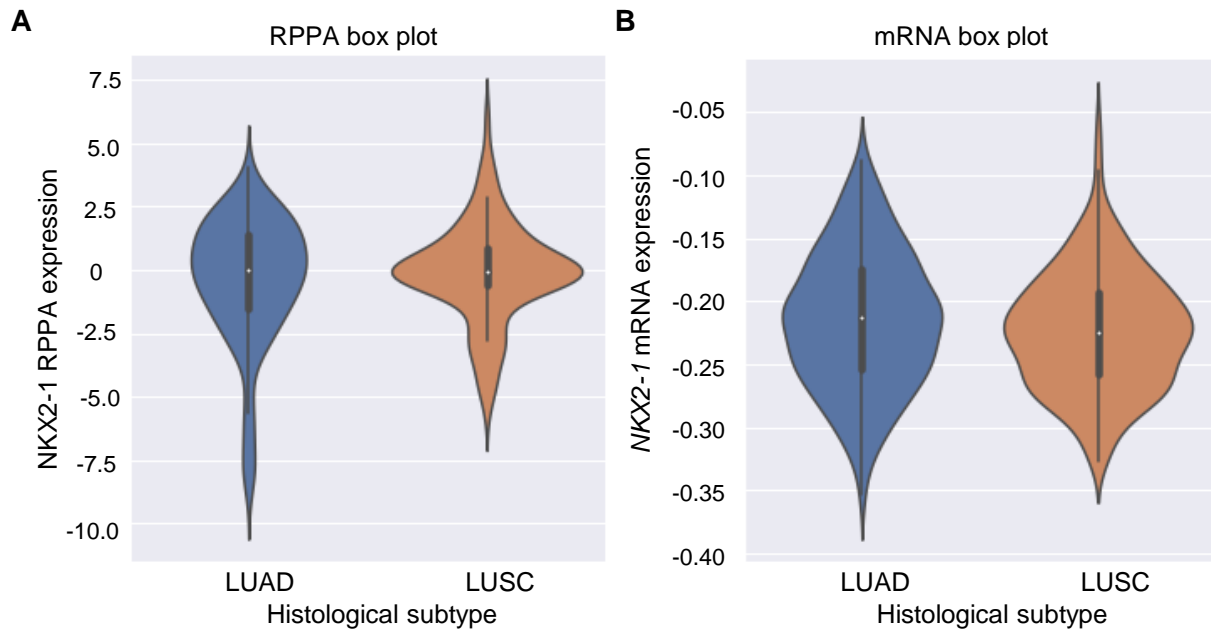

**Supplementary Figure S3.** Relationship between histological subtypes of lung cancer and NKX2-1 expression levels. (A) Relationship between NKX2-1 RPPA expression levels and histological subtypes of lung cancer (LUAD or LUSC). *x*-Axis shows the histological subtypes of lung cancer, and *y*-axis shows the value of NKX2-1 RPPA expression levels that are standardized against row (sample ID). (B) Relationship between *NKX2-1* mRNA expression levels and histological subtypes. *x*-Axis shows histological types of lung cancer, and *y*-axis shows the value of *NKX2-1* mRNA expression levels that are standardized against row (sample ID).

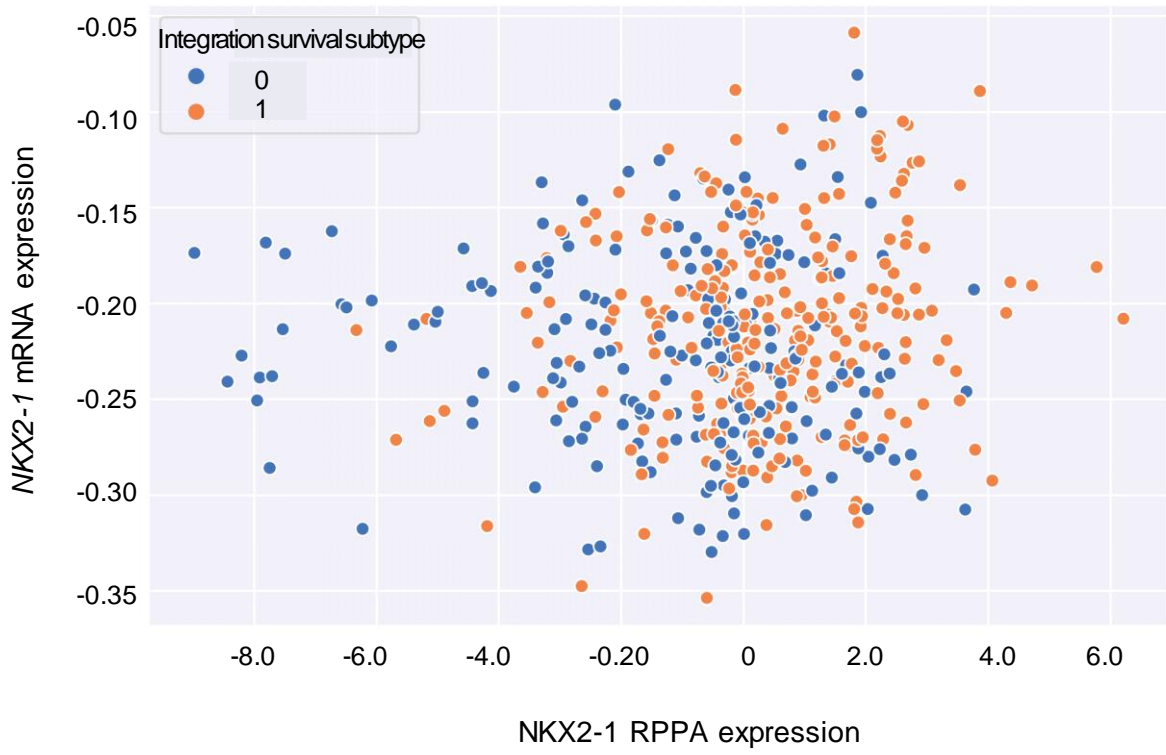

**Supplementary Figure S4.** Scatter plot analysis of NKX2-1 mRNA and RPPA expression levels.

**Supplementary Table S1.** The summary of advantages and disadvantages regarding single omics and multi-omics analyses.

| <b>Items</b>          | <b>Single omics analysis</b> | <b>Multi omics analysis</b> |
|-----------------------|------------------------------|-----------------------------|
| Robustness for noise  | Weak                         | Strong                      |
| Amount of information | Small                        | Large                       |
| Cost                  | Low                          | High                        |
| Analysis method       | Well developed               | Developing now              |

**Supplementary Table S2.** The summary of selected protein strongly related with survival using Cox-PH regression model in common RPPA data.

| <b>Protein</b> | <b>Log-rank <i>p</i> value</b> |
|----------------|--------------------------------|
| ERRFI1         | 0.017                          |
| CCND1          | 0.018                          |
| BCL2           | 0.024                          |
| KDR            | 0.031                          |
| PRKCA          | 0.035                          |
| RAB25          | 0.042                          |
| FN1            | 0.046                          |
| CLDN7          | 0.047                          |
| G6PD           | 0.047                          |
| PECAM1         | 0.048                          |
